# Supplementary figures and images for: Serotonin modulates insect hemocyte phagocytosis via two different serotonin receptors
Source: eLife journal article supplement (doi:10.7554/elife.12241), 2016-03-14

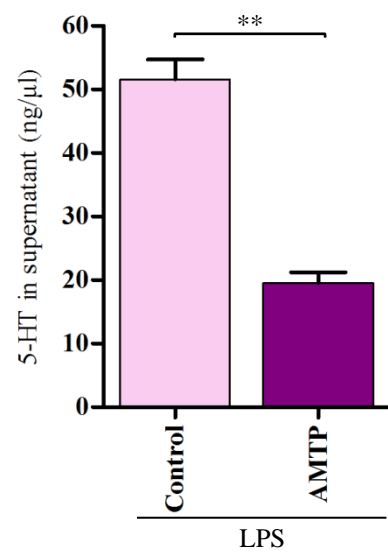

Supplement: supp [file elife_poa_e12241_Figure_2_figure_supplement_1.pdf › elife_poa_e12241_Figure_2_figure_supplement_1.pdf]

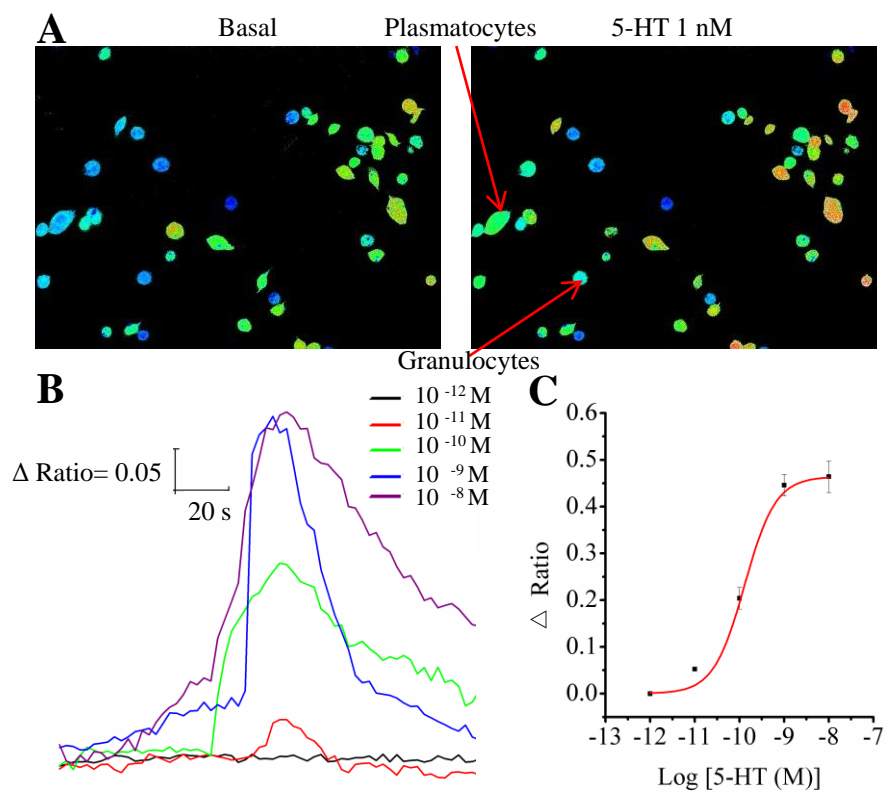

Supplement: supp [file elife_poa_e12241_Figure_3_figure_supplement_1.pdf › elife_poa_e12241_Figure_3_figure_supplement_1.pdf]

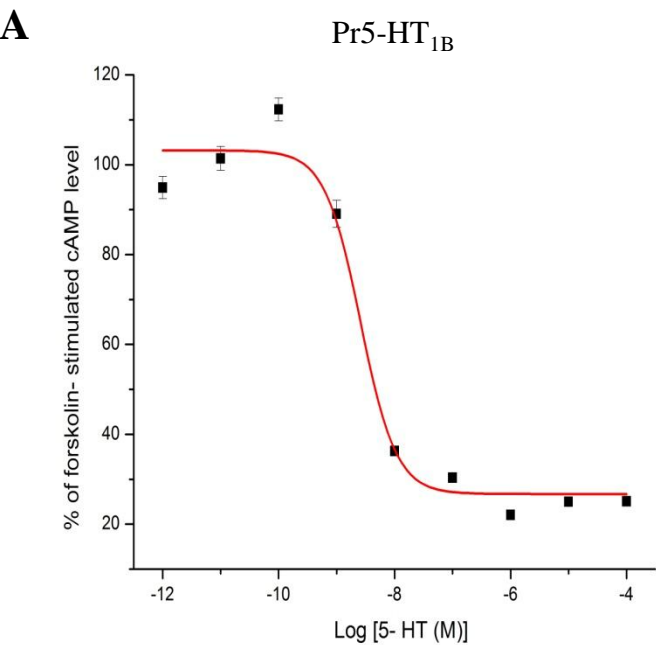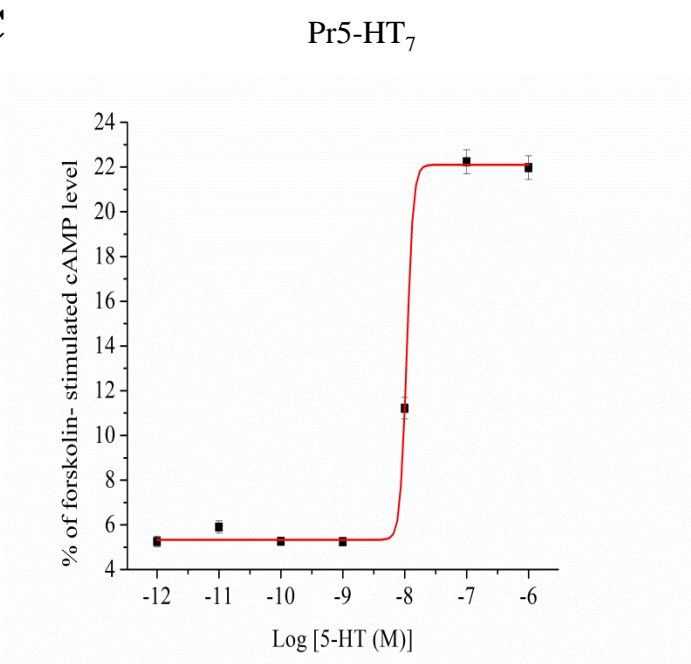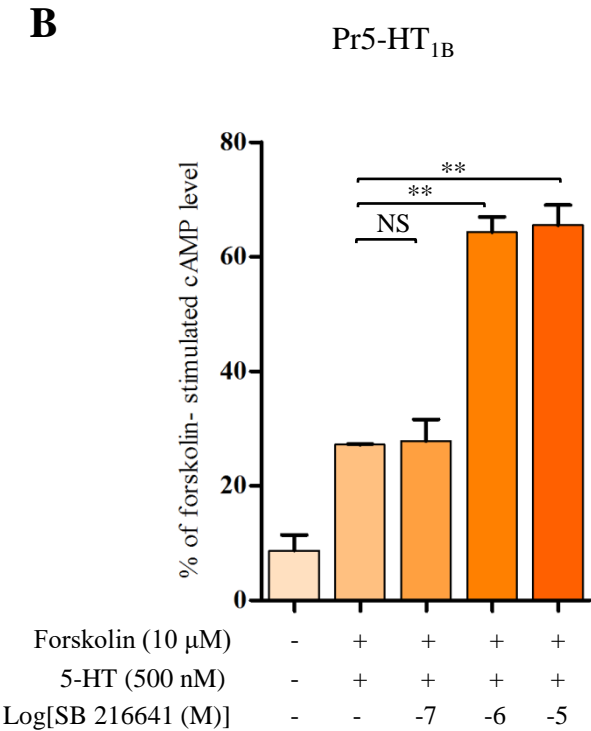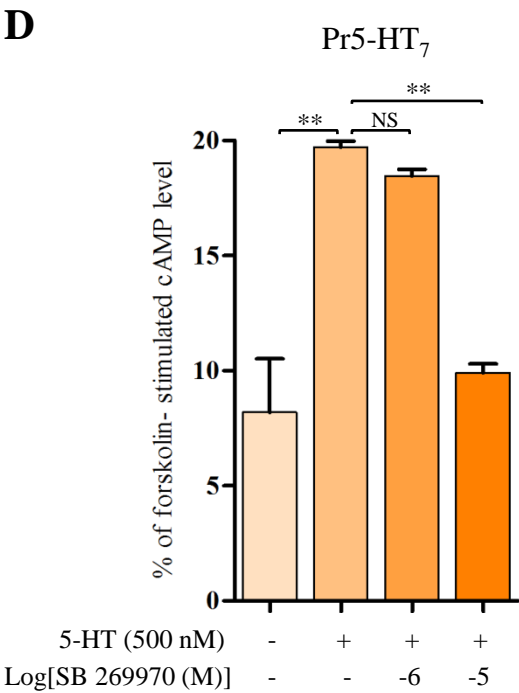

Supplement: supp [file elife_poa_e12241_Figure_3_figure_supplement_2.pdf › elife_poa_e12241_Figure_3_figure_supplement_2.pdf]

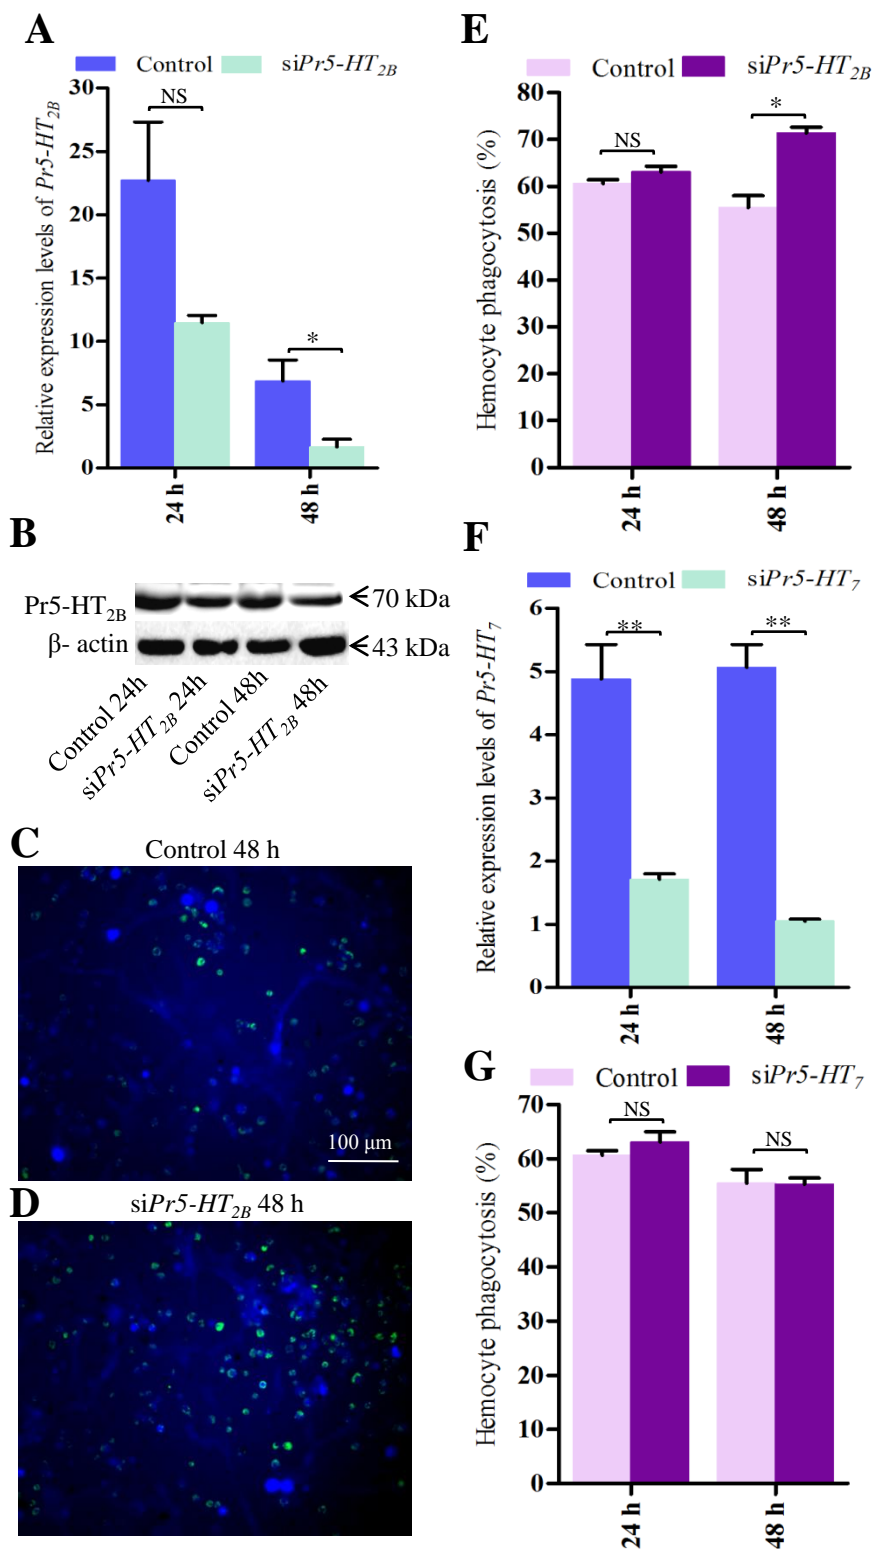

Supplement: supp [file elife_poa_e12241_Figure_4_figure_supplement_1.pdf › elife_poa_e12241_Figure_4_figure_supplement_1.pdf]
